# Supplementary material for: Fast and low-dose medical imaging generation empowered by hybrid deep-learning and iterative reconstruction
Source: PubMed Central journal article supplement — Cell Rep Med. 2023 Jul 18;4(7):101119. doi: 10.1016/j.xcrm.2023.101119 (PMC10394257; doi:10.1016/j.xcrm.2023.101119), 2023-07-18
Supplement: mmc1.pdf [file mmc1.pdf]

**Cell Reports Medicine, Volume 4**

**Supplemental information**

**Fast and low-dose medical imaging  
generation empowered by hybrid  
deep-learning and iterative reconstruction**

**Shu Liao, Zhanhao Mo, Mengsu Zeng, Jiaojiao Wu, Yuning Gu, Guobin Li, Guotao Quan, Yang Lv, Lin Liu, Chun Yang, Xinglie Wang, Xiaoqian Huang, Yang Zhang, Wenjing Cao, Yun Dong, Ying Wei, Qing Zhou, Yongqin Xiao, Yiqiang Zhan, Xiang Sean Zhou, Feng Shi, and Dinggang Shen**

## Supplemental Figures

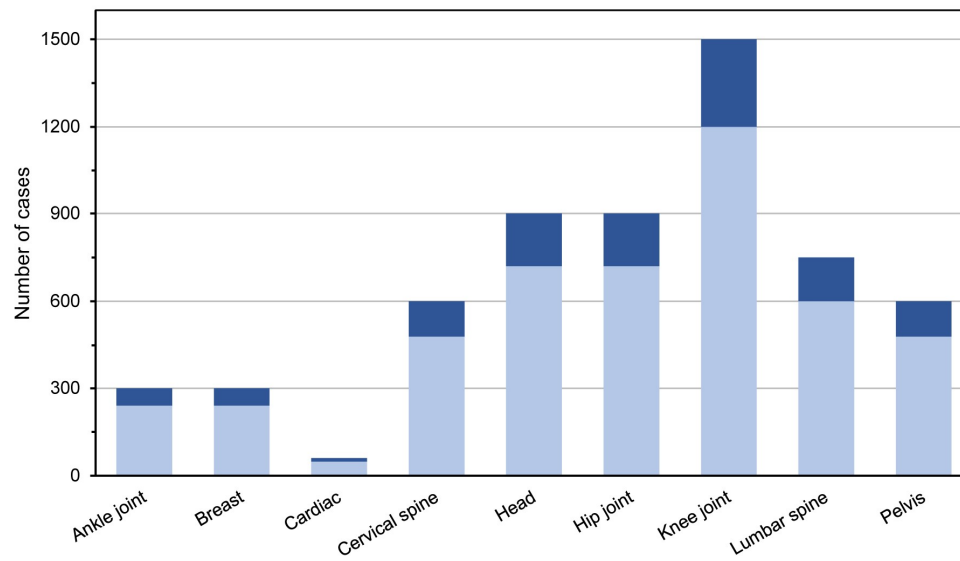

**Figure S1. ACS is trained and tested on 5,910 cases for fast MRI scans of 9 organs. Related to Figure 2 and STAR Methods. In each column, the darker one represents the testing set, and the lighter one represents the training set.**

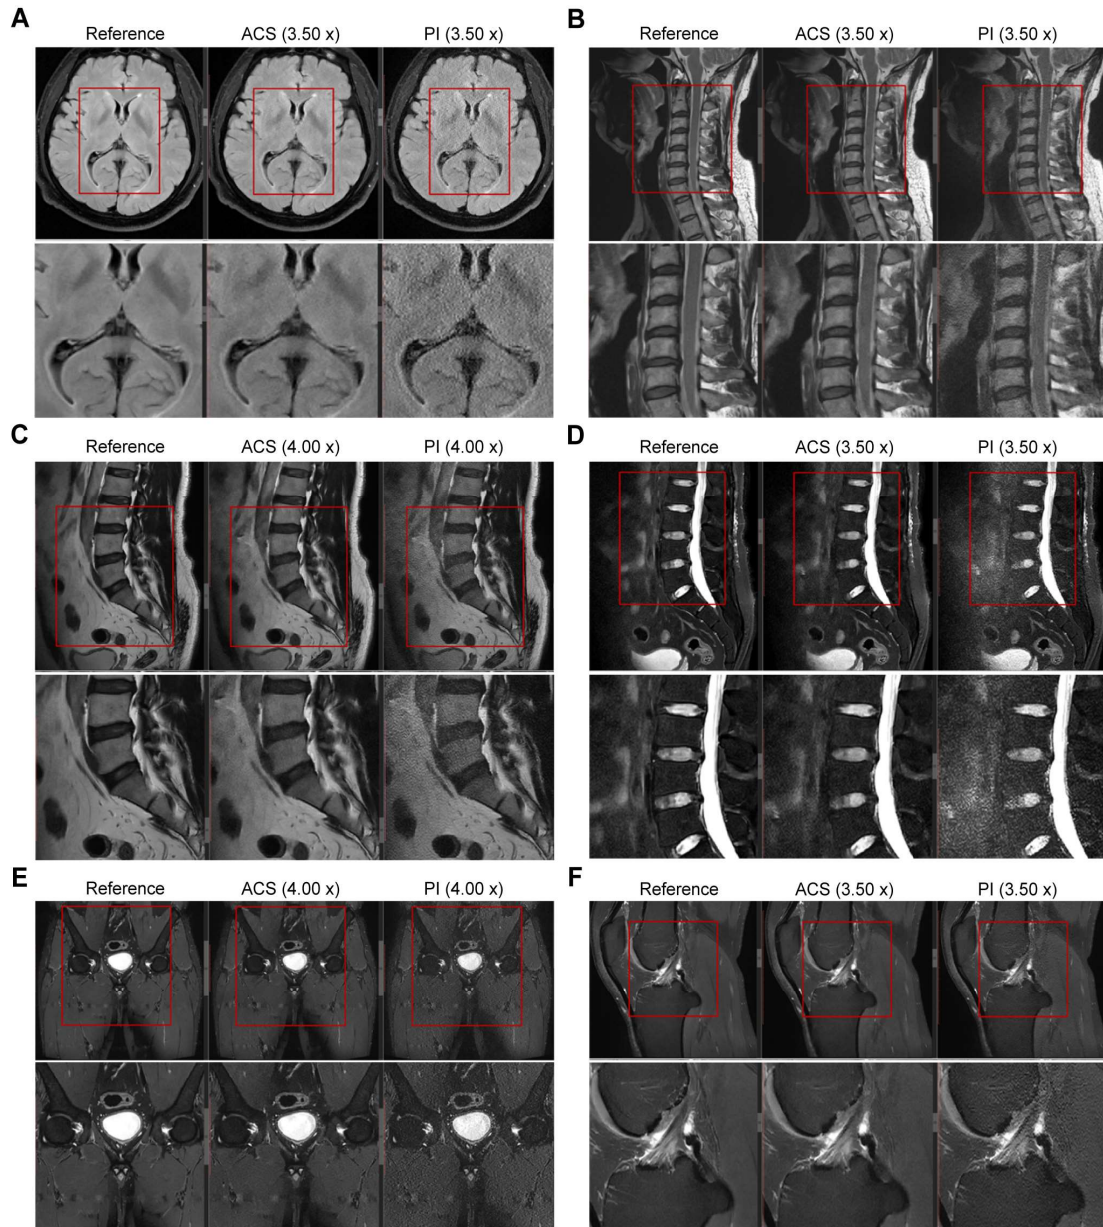

**Figure S2. Comparison between ACS and PI reconstructions of down-sampled MRI data collected from various organs using multiple pulse sequences in the testing dataset. Related to Figure 2. (A) T2w FLAIR images of the head ( $3.50 \times$  acceleration). (B) T2w images of the cervical spine ( $3.50 \times$  acceleration). (C) T2w images of the lumbar spine ( $4.00 \times$  acceleration). (D) T2w fat reduction images of the lumbar spine ( $3.50 \times$  acceleration). (E) STIR images of the hip ( $4.00 \times$  acceleration). (F) PDw fat reduction images of the knee ( $3.50 \times$  acceleration).**

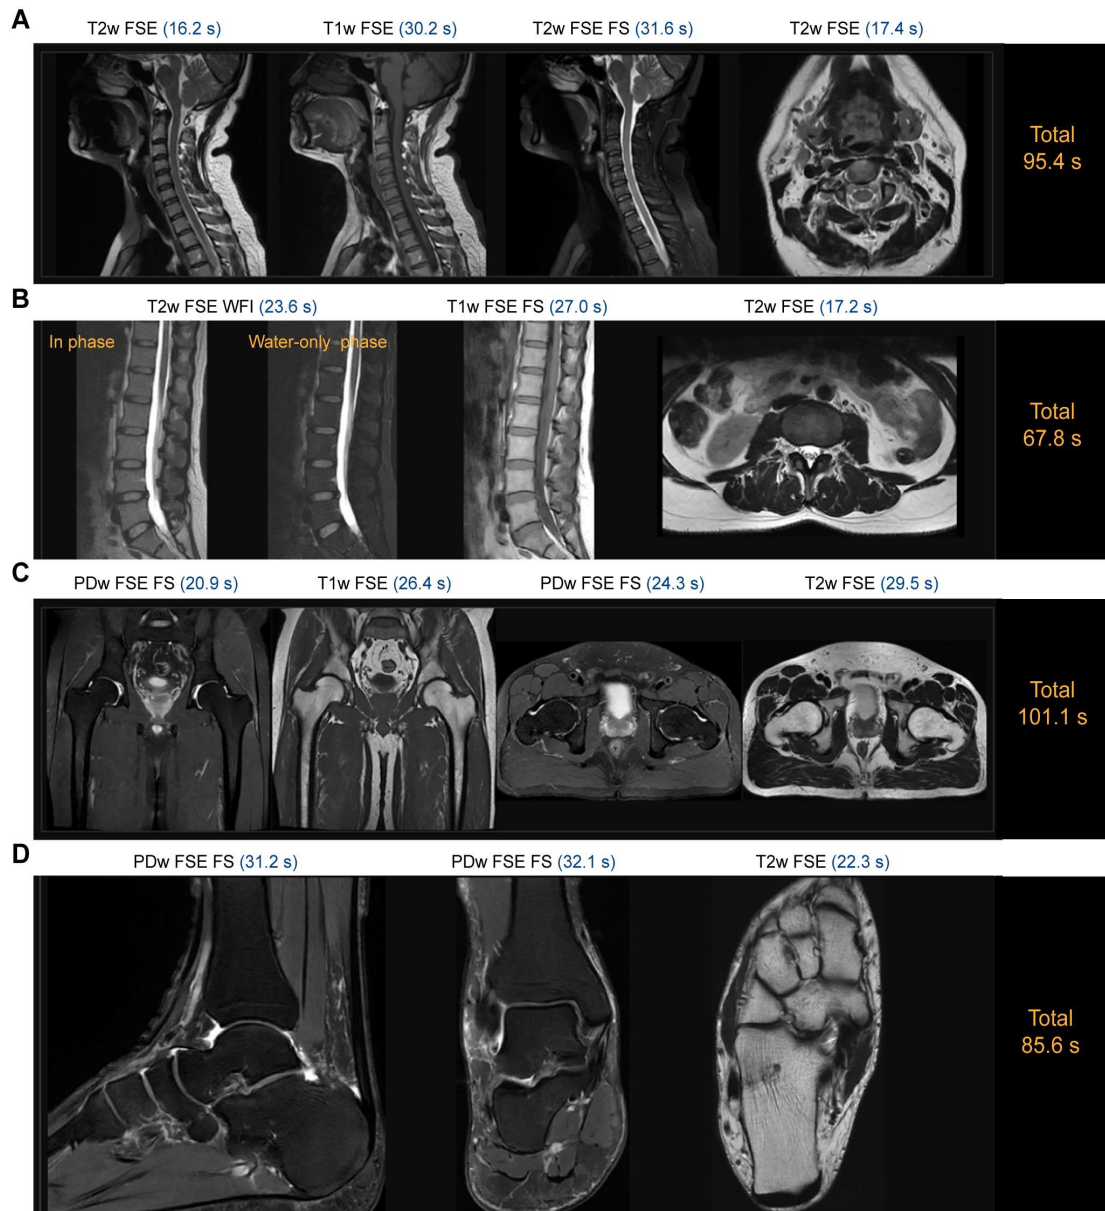

**Figure S3. ACS reconstruction of 100-s level fast MRI scans for multiple organs. Related to Figure 4.** ACS achieves 100 s-level fast MRI scans for cervical spine (A), lumbar spine (B), hip joint (C), and ankle joint (D). Reasonable reconstruction can be achieved for 3 to 4 fast MRI scans performed in ~100 s using different pulse sequences.

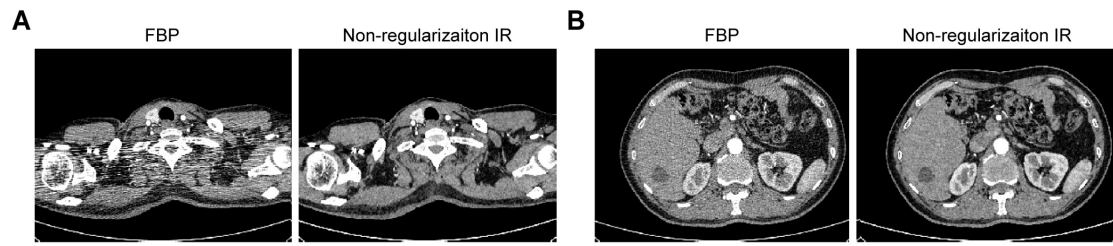

**Figure S4. CT images of the shoulder (A) and the abdomen (B) reconstructed by FBP and non-regularization IR. Related to STAR Methods.**

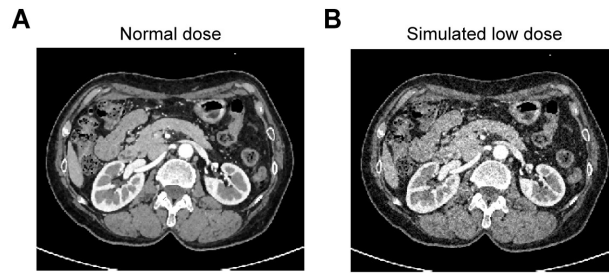

**Figure S5. CT images reconstructed by non-regularization IR at a normal dose (A) and a simulated low dose (B). Related to STAR Methods.**

|                   | A   | B       | C       | D       | E       | F       |
|-------------------|-----|---------|---------|---------|---------|---------|
| OSEM_120 s/bp (A) |     | < 0.001 | < 0.001 | < 0.001 | < 0.001 | < 0.001 |
| DPR_120 s/bp (B)  | *** |         | 1.000   | 0.735   | 1.000   | 1.000   |
| DPR_90 s/bp (C)   | *** | no      |         | 1.000   | 1.000   | 1.000   |
| DPR_60 s/bp (D)   | *** | no      | no      |         | 0.773   | 1.000   |
| DPR_40 s/bp (E)   | *** | no      | no      | no      |         | 1.000   |
| DPR_30 s/bp (F)   | *** | no      | no      | no      | no      |         |

Significant difference test

|                   | A   | B       | C       | D       | E       | F       |
|-------------------|-----|---------|---------|---------|---------|---------|
| OSEM_120 s/bp (A) |     | < 0.001 | < 0.001 | < 0.001 | 0.759   | 0.001   |
| DPR_120 s/bp (B)  | *** |         | < 0.001 | < 0.001 | < 0.001 | < 0.001 |
| DPR_90 s/bp (C)   | *** | ***     |         | < 0.001 | < 0.001 | < 0.001 |
| DPR_60 s/bp (D)   | *** | **      | ***     |         | < 0.001 | < 0.001 |
| DPR_40 s/bp (E)   | no  | ***     | ***     | ***     |         | < 0.001 |
| DPR_30 s/bp (F)   | **  | ***     | ***     | ***     | ***     |         |

Significant difference test

**Figure S6. Statistical difference tests for  $SUV_{max}$  of identified lesions (the left) and SNR in the liver (the right). Related to Figure 6.** Statistical analyses on  $SUV_{max}$  are performed using repeated measures one-way ANOVA followed by Turkey's multiple comparisons tests ( $n = 78$ ). Statistical analyses on SNR are performed using Friedman tests followed by Dunnett's multiple comparisons tests ( $n = 51$ ). Asterisk represents two-tailed adjusted  $P$  value, with \* indicating  $P < 0.05$ , \*\* indicating  $P < 0.01$ , and \*\*\* indicating  $P < 0.001$ .

## Supplemental Tables

**Table S1. Imaging protocols for 5,910 cases of MRI data from the training and testing datasets. Related to Figure 2.**

| Organ          | MR pulse sequence                                                                       | Case    |
|----------------|-----------------------------------------------------------------------------------------|---------|
| Ankle joint    | (1) pd_fse_fs; (2) t1_fse_cor                                                           | 150 × 2 |
| Breast         | (1) t1_fse; (2) stir_fse; (3) t2_fse                                                    | 100 × 3 |
| Cardiac        | (1) t1_fse; (2) t2_fse; (3) t2_fse_fs; (4) t2_fse_spair                                 | 15 × 4  |
| Cervical spine | (1) stir_fse_sag; (2) t1_fse_sag; (3) t2_fse_sag; (4) t2_fse_wfi_sag                    | 150 × 4 |
| Head           | (1) t1_fse_flair; (2) t2_fse_flair_fs; (3) t2_fse                                       | 300 × 3 |
| Hip joint      | (1) pd_fse_fs; (2) stir_fse_cor; (3) t1_fse_cor                                         | 300 × 3 |
| Knee joint     | (1) pd_fse_fs; (2) t1_fse; (3) t2_fse; (4) t2_fse_fs                                    | 375 × 4 |
| Lumbar spine   | (1) t1_fse_cor_fs; (2) t1_fse_sag; (3) t2_fse; (4) t2_fse_sag_fs;<br>(5) t2_fse_wfi_sag | 150 × 5 |
| Pelvis         | (1) t1_fse; (2) t2_fse                                                                  | 300 × 2 |

List of abbreviations: cor, coronal; flair, flow attenuated inversion recovery; fs, fat suppression; fse, fast spin echo; pd, proton density; sag, sagittal; spair, spectral attenuated inversion recovery; stir, short TI inversion recovery; wfi, water-fat imaging.



**Table S2. Quantitative metrics of ACS, PI, AI, and PI + AI methods for reconstructing down-sampled MRI data from the testing dataset under different acceleration factors. Related to Figure 2.** MSE and NMSE values with asymmetrical distributions are represented as median (25<sup>th</sup>, 75<sup>th</sup> percentiles). NRMSE, SNR, PSNR, and SSIM values fit normal distribution and are represented as mean  $\pm$  standard deviation. Lower error-related metrics (i.e., MSE, NMSE, and NRMSE) and higher consistency-related metrics (i.e., SNR, PSNR, and SSIM) stand for lower noise and better reconstruction performance. Statistical analyses are performed using two-way ANOVA followed by Sidak's multiple comparisons tests (n = 14).

| Acceleration factor           | ACS               | PI                | AI                | PI + AI           | $P_{(ACS \text{ vs. } PI)}$ | $P_{(ACS \text{ vs. } AI)}$ | $P_{(ACS \text{ vs. } PI + AI)}$ |
|-------------------------------|-------------------|-------------------|-------------------|-------------------|-----------------------------|-----------------------------|----------------------------------|
| <b>MSE (* 10<sup>8</sup>)</b> |                   |                   |                   |                   |                             |                             |                                  |
| 2.00                          | 0.74 (0.38, 1.68) | 2.84 (1.36, 6.76) | 3.40 (1.11, 5.19) | 1.72 (0.73, 3.19) | 0.028                       | 0.015                       | 0.025                            |
| 2.25                          | 0.98 (0.48, 2.15) | 3.28 (1.51, 7.87) | 4.05 (1.27, 5.73) | 1.97 (0.87, 3.69) | 0.028                       | 0.015                       | 0.026                            |
| 2.50                          | 1.16 (0.56, 2.55) | 3.62 (1.62, 8.50) | 4.45 (1.39, 6.14) | 2.16 (0.96, 4.10) | 0.030                       | 0.015                       | 0.027                            |
| 2.75                          | 1.32 (0.64, 2.99) | 3.95 (1.75, 9.06) | 4.80 (1.59, 7.52) | 2.34 (1.06, 4.54) | 0.034                       | 0.019                       | 0.025                            |
| 3.00                          | 1.48 (0.72, 3.30) | 4.59 (1.85, 9.93) | 5.09 (1.68, 8.05) | 2.50 (1.14, 4.83) | 0.051                       | 0.023                       | 0.025                            |
| <b>NMSE (%)</b>               |                   |                   |                   |                   |                             |                             |                                  |
| 2.00                          | 0.51 (0.30, 0.93) | 1.72 (1.40, 2.28) | 1.70 (1.11, 2.16) | 0.90 (0.63, 1.38) | < 0.001                     | < 0.001                     | < 0.001                          |
| 2.25                          | 0.65 (0.38, 1.19) | 2.00 (1.51, 2.76) | 2.01 (1.22, 2.56) | 1.05 (0.72, 1.74) | < 0.001                     | < 0.001                     | < 0.001                          |
| 2.50                          | 0.77 (0.45, 1.40) | 2.24 (1.59, 3.04) | 2.24 (1.30, 2.86) | 1.19 (0.80, 1.98) | < 0.001                     | < 0.001                     | < 0.001                          |
| 2.75                          | 0.92 (0.52, 1.61) | 2.46 (1.66, 3.37) | 2.54 (1.40, 3.18) | 1.34 (0.88, 2.19) | < 0.001                     | 0.004                       | < 0.001                          |
| 3.00                          | 1.02 (0.57, 1.77) | 2.94 (1.75, 4.06) | 2.87 (1.52, 3.38) | 1.47 (0.93, 2.38) | < 0.001                     | 0.009                       | < 0.001                          |
| <b>NRMSE (%)</b>              |                   |                   |                   |                   |                             |                             |                                  |
| 2.00                          | 7.87 $\pm$ 2.91   | 13.82 $\pm$ 2.36  | 13.08 $\pm$ 2.84  | 10.30 $\pm$ 2.80  | < 0.001                     | < 0.001                     | < 0.001                          |
| 2.25                          | 8.99 $\pm$ 3.43   | 14.78 $\pm$ 2.83  | 14.11 $\pm$ 3.36  | 11.29 $\pm$ 3.33  | < 0.001                     | < 0.001                     | < 0.001                          |
| 2.50                          | 9.75 $\pm$ 3.72   | 15.39 $\pm$ 3.10  | 14.76 $\pm$ 3.63  | 11.95 $\pm$ 3.63  | < 0.001                     | < 0.001                     | < 0.001                          |
| 2.75                          | 10.48 $\pm$ 3.95  | 16.00 $\pm$ 3.36  | 15.69 $\pm$ 4.31  | 12.61 $\pm$ 3.86  | < 0.001                     | < 0.001                     | < 0.001                          |
| 3.00                          | 11.03 $\pm$ 4.16  | 16.97 $\pm$ 3.76  | 16.39 $\pm$ 4.62  | 13.11 $\pm$ 4.08  | < 0.001                     | < 0.001                     | < 0.001                          |
| <b>SNR</b>                    |                   |                   |                   |                   |                             |                             |                                  |
| 2.00                          | 22.28 $\pm$ 3.25  | 16.62 $\pm$ 1.58  | 17.20 $\pm$ 2.00  | 19.49 $\pm$ 2.41  | < 0.001                     | < 0.001                     | < 0.001                          |
| 2.25                          | 21.09 $\pm$ 3.39  | 16.04 $\pm$ 1.79  | 16.53 $\pm$ 2.22  | 18.69 $\pm$ 2.64  | < 0.001                     | < 0.001                     | < 0.001                          |
| 2.50                          | 20.35 $\pm$ 3.41  | 15.68 $\pm$ 1.89  | 16.11 $\pm$ 2.31  | 18.17 $\pm$ 2.73  | < 0.001                     | < 0.001                     | < 0.001                          |
| 2.75                          | 19.67 $\pm$ 3.40  | 15.35 $\pm$ 1.98  | 15.61 $\pm$ 2.55  | 17.68 $\pm$ 2.79  | < 0.001                     | < 0.001                     | < 0.001                          |
| 3.00                          | 19.20 $\pm$ 3.42  | 14.88 $\pm$ 2.11  | 15.22 $\pm$ 2.61  | 17.33 $\pm$ 2.84  | < 0.001                     | < 0.001                     | < 0.001                          |
| <b>PSNR</b>                   |                   |                   |                   |                   |                             |                             |                                  |

|             |              |              |              |              |         |         |         |
|-------------|--------------|--------------|--------------|--------------|---------|---------|---------|
| 2.00        | 41.69 ± 3.95 | 36.39 ± 3.34 | 36.94 ± 3.54 | 39.10 ± 3.57 | < 0.001 | < 0.001 | < 0.001 |
| 2.25        | 40.57 ± 4.13 | 35.83 ± 3.46 | 36.32 ± 3.67 | 38.36 ± 3.74 | < 0.001 | < 0.001 | < 0.001 |
| 2.50        | 39.86 ± 4.14 | 35.49 ± 3.49 | 35.95 ± 3.70 | 37.88 ± 3.78 | < 0.001 | < 0.001 | < 0.001 |
| 2.75        | 39.22 ± 4.13 | 35.17 ± 3.54 | 35.47 ± 3.85 | 37.43 ± 3.79 | < 0.001 | < 0.001 | < 0.001 |
| 3.00        | 38.78 ± 4.13 | 34.69 ± 3.71 | 35.11 ± 3.83 | 37.10 ± 3.81 | < 0.001 | < 0.001 | < 0.001 |
| <b>SSIM</b> |              |              |              |              |         |         |         |
| 2.00        | 0.95 ± 0.02  | 0.93 ± 0.02  | 0.94 ± 0.02  | 0.94 ± 0.02  | < 0.001 | < 0.001 | < 0.001 |
| 2.25        | 0.94 ± 0.02  | 0.91 ± 0.04  | 0.92 ± 0.03  | 0.93 ± 0.03  | < 0.001 | < 0.001 | < 0.001 |
| 2.50        | 0.93 ± 0.03  | 0.90 ± 0.04  | 0.91 ± 0.03  | 0.92 ± 0.03  | < 0.001 | < 0.001 | < 0.001 |
| 2.75        | 0.92 ± 0.03  | 0.88 ± 0.05  | 0.90 ± 0.03  | 0.91 ± 0.03  | 0.003   | < 0.001 | < 0.001 |
| 3.00        | 0.91 ± 0.03  | 0.86 ± 0.07  | 0.89 ± 0.04  | 0.90 ± 0.03  | 0.021   | < 0.001 | < 0.001 |

**Table S3. Quantitative metrics of ACS, MoDL, and E2E-VarNet methods for reconstructing down-sampled MRI data from the testing dataset under different acceleration factors. Related to Figure 2.** MSE and NMSE values with asymmetrical distributions are represented as median (25<sup>th</sup>, 75<sup>th</sup> percentiles). NRMSE, SNR, PSNR, and SSIM values fit normal distribution and are represented as mean  $\pm$  standard deviation. Lower error-related metrics (i.e., MSE, NMSE, and NRMSE) and higher consistency-related metrics (i.e., SNR, PSNR, and SSIM) stand for lower noise and better reconstruction performance. Statistical analyses are performed using two-way ANOVA followed by Sidak’s multiple comparisons tests (n = 14).

| Acceleration factor           | ACS               | MoDL              | E2E_VarNet          | $P_{(ACS \text{ vs. MoDL})}$ | $P_{(ACS \text{ vs. E2E_VarNet})}$ |
|-------------------------------|-------------------|-------------------|---------------------|------------------------------|------------------------------------|
| <b>MSE (* 10<sup>8</sup>)</b> |                   |                   |                     |                              |                                    |
| 2.00                          | 0.74 (0.38, 1.68) | 2.34 (1.00, 4.19) | 11.77 (6.17, 34.15) | 0.099                        | 0.035                              |
| 2.25                          | 0.98 (0.48, 2.15) | 2.51 (1.11, 4.46) | 12.35 (6.35, 33.83) | 0.054                        | 0.033                              |
| 2.50                          | 1.16 (0.56, 2.55) | 2.49 (1.09, 4.58) | 12.65 (6.45, 34.18) | 0.081                        | 0.032                              |
| 2.75                          | 1.32 (0.64, 2.99) | 2.44 (1.22, 4.45) | 14.70 (6.69, 34.93) | 0.115                        | 0.028                              |
| 3.00                          | 1.48 (0.72, 3.30) | 2.58 (1.25, 4.59) | 15.40 (6.77, 35.53) | 0.124                        | 0.027                              |
| <b>NMSE (%)</b>               |                   |                   |                     |                              |                                    |
| 2.00                          | 0.51 (0.30, 0.93) | 1.65 (0.89, 2.46) | 7.93 (7.32, 8.46)   | < 0.001                      | < 0.001                            |
| 2.25                          | 0.65 (0.38, 1.19) | 1.78 (0.92, 2.51) | 8.14 (7.42, 8.99)   | < 0.001                      | < 0.001                            |
| 2.50                          | 0.77 (0.45, 1.40) | 1.75 (0.95, 2.58) | 8.32 (7.49, 9.33)   | < 0.001                      | < 0.001                            |
| 2.75                          | 0.92 (0.52, 1.61) | 1.67 (1.02, 2.62) | 8.58 (7.70, 9.77)   | < 0.001                      | < 0.001                            |
| 3.00                          | 1.02 (0.57, 1.77) | 1.67 (1.00, 2.72) | 8.93 (8.01, 9.98)   | < 0.001                      | < 0.001                            |
| <b>NRMSE (%)</b>              |                   |                   |                     |                              |                                    |
| 2.00                          | 7.87 $\pm$ 2.91   | 12.83 $\pm$ 4.00  | 28.08 $\pm$ 1.29    | < 0.001                      | < 0.001                            |
| 2.25                          | 8.99 $\pm$ 3.43   | 13.13 $\pm$ 3.99  | 28.61 $\pm$ 1.61    | < 0.001                      | < 0.001                            |
| 2.50                          | 9.75 $\pm$ 3.72   | 13.21 $\pm$ 3.99  | 28.94 $\pm$ 1.71    | < 0.001                      | < 0.001                            |
| 2.75                          | 10.48 $\pm$ 3.95  | 13.29 $\pm$ 3.99  | 29.69 $\pm$ 2.36    | < 0.001                      | < 0.001                            |
| 3.00                          | 11.03 $\pm$ 4.16  | 13.51 $\pm$ 4.03  | 30.38 $\pm$ 2.94    | < 0.001                      | < 0.001                            |
| <b>SNR</b>                    |                   |                   |                     |                              |                                    |
| 2.00                          | 22.28 $\pm$ 3.25  | 17.94 $\pm$ 3.03  | 9.94 $\pm$ 0.55     | < 0.001                      | < 0.001                            |
| 2.25                          | 21.09 $\pm$ 3.39  | 17.76 $\pm$ 2.98  | 9.75 $\pm$ 0.64     | < 0.001                      | < 0.001                            |
| 2.50                          | 20.35 $\pm$ 3.41  | 17.70 $\pm$ 2.95  | 9.62 $\pm$ 0.69     | < 0.001                      | < 0.001                            |
| 2.75                          | 19.67 $\pm$ 3.40  | 17.64 $\pm$ 2.93  | 9.39 $\pm$ 0.80     | < 0.001                      | < 0.001                            |
| 3.00                          | 19.20 $\pm$ 3.42  | 17.49 $\pm$ 2.90  | 9.18 $\pm$ 0.90     | < 0.001                      | < 0.001                            |
| <b>PSNR</b>                   |                   |                   |                     |                              |                                    |

|      |              |              |              |         |         |
|------|--------------|--------------|--------------|---------|---------|
| 2.00 | 41.69 ± 3.95 | 37.33 ± 4.03 | 30.13 ± 3.40 | < 0.001 | < 0.001 |
| 2.25 | 40.57 ± 4.13 | 37.11 ± 3.98 | 29.97 ± 3.39 | < 0.001 | < 0.001 |
| 2.50 | 39.86 ± 4.14 | 37.05 ± 3.95 | 29.87 ± 3.38 | < 0.001 | < 0.001 |
| 2.75 | 39.22 ± 4.13 | 37.00 ± 3.90 | 29.66 ± 3.44 | < 0.001 | < 0.001 |
| 3.00 | 38.78 ± 4.13 | 36.85 ± 3.92 | 29.47 ± 3.41 | < 0.001 | < 0.001 |
| SSIM |              |              |              |         |         |
| 2.00 | 0.95 ± 0.02  | 0.89 ± 0.05  | 0.89 ± 0.04  | < 0.001 | < 0.001 |
| 2.25 | 0.94 ± 0.02  | 0.89 ± 0.05  | 0.88 ± 0.04  | < 0.001 | < 0.001 |
| 2.50 | 0.93 ± 0.03  | 0.89 ± 0.05  | 0.88 ± 0.05  | 0.005   | < 0.001 |
| 2.75 | 0.92 ± 0.03  | 0.88 ± 0.05  | 0.87 ± 0.05  | 0.047   | < 0.001 |
| 3.00 | 0.91 ± 0.03  | 0.88 ± 0.06  | 0.86 ± 0.05  | 0.223   | 0.002   |

**Table S4. NRMSE values of ACS and PI methods for reconstructing down-sampled MRI data from the external validation dataset under different acceleration factors. Related to Figure 3.**

NRMSE value fits normal distribution and is represented as mean  $\pm$  standard deviation. Lower NRMSE stands for lower noise. Statistical analyses are performed using paired *t*-tests ( $n = 78$ ).

| Acceleration factor | ACS (%)          | PI (%)           | <i>P</i> |
|---------------------|------------------|------------------|----------|
| <b>T1w FLAIR</b>    |                  |                  |          |
| 2.00                | 6.54 $\pm$ 0.64  | 5.89 $\pm$ 1.38  | < 0.001  |
| 2.25                | 7.09 $\pm$ 0.71  | 7.31 $\pm$ 1.33  | 0.029    |
| 2.50                | 8.17 $\pm$ 0.82  | 9.16 $\pm$ 1.47  | < 0.001  |
| 2.75                | 9.18 $\pm$ 0.89  | 10.22 $\pm$ 1.50 | < 0.001  |
| 3.00                | 9.43 $\pm$ 0.89  | 12.37 $\pm$ 1.47 | < 0.001  |
| 3.25                | 9.91 $\pm$ 1.06  | 15.23 $\pm$ 1.49 | < 0.001  |
| 3.50                | 10.03 $\pm$ 0.95 | 18.37 $\pm$ 1.50 | < 0.001  |
| 3.75                | 10.18 $\pm$ 1.00 | 25.74 $\pm$ 1.56 | < 0.001  |
| 4.00                | 10.54 $\pm$ 0.88 | 28.42 $\pm$ 1.62 | < 0.001  |
| <b>T2w FLAIR</b>    |                  |                  |          |
| 2.00                | 6.92 $\pm$ 0.63  | 7.05 $\pm$ 1.18  | 0.049    |
| 2.25                | 8.50 $\pm$ 0.63  | 9.58 $\pm$ 1.04  | < 0.001  |
| 2.50                | 10.04 $\pm$ 0.83 | 13.65 $\pm$ 1.15 | < 0.001  |
| 2.75                | 10.24 $\pm$ 0.76 | 12.19 $\pm$ 1.23 | < 0.001  |
| 3.00                | 10.73 $\pm$ 0.82 | 15.37 $\pm$ 1.16 | < 0.001  |
| 3.25                | 11.11 $\pm$ 0.83 | 19.36 $\pm$ 1.05 | < 0.001  |
| 3.50                | 11.74 $\pm$ 0.89 | 22.58 $\pm$ 1.16 | < 0.001  |
| 3.75                | 12.15 $\pm$ 0.89 | 27.48 $\pm$ 1.33 | < 0.001  |
| 4.00                | 12.22 $\pm$ 0.90 | 30.58 $\pm$ 1.33 | < 0.001  |

**Table S5. Statistics for lesion SUV<sub>max</sub> and liver SNR. Related to Figure 6.** Lesion SUV<sub>max</sub> does not fit the normal distribution and is thus represented as median (25<sup>th</sup>, 75<sup>th</sup> percentiles), while SNR fits normal distribution and is represented as mean  $\pm$  standard deviation.

| Group         | Lesion SUV <sub>max</sub> | Liver SNR        |
|---------------|---------------------------|------------------|
| OSEM_120 s/bp | 9.42 (6.73, 13.07)        | 7.91 $\pm$ 1.57  |
| DPR_120 s/bp  | 11.42 (7.54, 15.28)       | 13.53 $\pm$ 2.65 |
| DRP_90 s/bp   | 11.14 (7.40, 14.73)       | 11.99 $\pm$ 2.48 |
| DPR_60 s/bp   | 11.17 (7.09, 15.11)       | 10.14 $\pm$ 2.30 |
| DPR_40 s/bp   | 11.25 (6.91, 16.44)       | 8.16 $\pm$ 1.78  |
| DPR_30 s/bp   | 10.99 (6.98, 16.23)       | 6.79 $\pm$ 1.65  |
